# Supplementary material for: COVID-19 Vaccine Hesitancy among Italian University Students: A Cross-Sectional Survey during the First Months of the Vaccination Campaign
Source: MDPI journal article supplement (doi:10.3390/vaccines9111292), 2021-11-07
Supplement: s1 [file s1]

**Table S1.** Multivariable logistic regression model for COVID-19 vaccine hesitancy among the healthcare students surveyed between March 1<sup>st</sup> and June 30<sup>th</sup>, 2021, Sapienza University of Rome (N=1543).

|                                      | COVID-19 Vaccine Hesitancy |         |
|--------------------------------------|----------------------------|---------|
|                                      | OR (95% CI)                | p-value |
| Survey period                        |                            |         |
| #1 (March 1st - March 12th, 2021)    | Ref.                       |         |
| #2 (April 12th - May 9th, 2021)      | 1.47 (1.02-2.13)           | 0.041   |
| #3 (May 10th - June 30th, 2021)      | 0.24 (0.81-1.89)           | 0.326   |
| Age (years)                          | 1.04 (0.99-1.08)           | 0.050   |
| Gender                               |                            |         |
| Female                               | Ref.                       |         |
| Male                                 | 1.44 (1.01-2.05)           | 0.042   |
| Nationality                          |                            |         |
| Italian                              | Ref.                       |         |
| Non-Italian                          | 1.05 (0.61-1.81)           | 0.856   |
| Year of study                        |                            |         |
| Third or above                       | Ref.                       |         |
| First or second                      | 1.71 (1.23-2.37)           | 0.001   |
| Finances                             |                            |         |
| Having some or many difficulties     | Ref.                       |         |
| Managing well enough or very well    | 0.88 (0.63-1.24)           | 0.461   |
| Politics                             |                            |         |
| Moderate                             | Ref.                       |         |
| Strongly left-wing                   | 1.23 (0.71-2.11)           | 0.463   |
| Strongly right-wing                  | 1.40 (0.40-4.90)           | 0.595   |
| Prefer not to answer                 | 1.07 (0.76-1.50)           | 0.696   |
| Perceived susceptibility to COVID-19 | 1.01 (0.94-1.08)           | 0.829   |
| Perceived COVID-19 severity          | 0.87 (0.78-0.96)           | 0.008   |
| Concern about the COVID-19 emergency | 1.11 (1.01-1.23)           | 0.049   |
| COVID-19 infection                   |                            |         |
| No                                   | Ref.                       |         |
| Yes                                  | 1.49 (0.81-2.72)           | 0.461   |
| Confidence in vaccine safety         | 0.52 (0.44-0.61)           | <0.001  |
| Confidence in vaccine effectiveness  | 0.78 (0.67-0.92)           | 0.002   |
| Adherence to mask wearing indoors    | 0.90 (0.81-1.01)           | 0.080   |
| Adherence to mask wearing outdoors   | 0.90 (0.84-0.98)           | 0.013   |
| Performing hand hygiene              | 0.92 (0.82-1.02)           | 0.132   |
| Maintaining physical distancing      | 0.95 (0.87-1.05)           | 0.318   |

OR: Odds Ratio. CI: Confidence Interval. COVID-19: Coronavirus disease 2019.
